# Supplementary material
Source: publisher site journal article supplement (https://www.dovepress.com/article/580432)
Supplement: Supplementary file 1 [file 580432%20Supplementary%20tables.docx]

Supplementary Table 1: Mean Variance Inflation Factor of Predictor Variables Across Multiple Imputed Datasets:

| Variable | Mean VIF |
| --- | --- |
| NLR | 1.211030 |
| Duration of Illness | 1.023160 |
| Age | 1.258344 |
| Winter Onset | 1.014788 |
| Hypoxemia | 1.020945 |
| Prematurity | 1.008777 |

Supplementary Table 2:Candidate Predictors Initially Selected via Elastic-Net Regression on Multiple Imputed Datasets:

| Variable | selection_frequency |
| --- | --- |
| ALB | 1 |
| Length of hospital stay | 1 |
| NLR | 1 |
| ALP | 1 |
| PCT | 1 |
| TBil | 1 |
| Age | 1 |
| Duration of Illness | 1 |
| Wheezing | 1 |
| Duration of Fever | 1 |
| Hypoxemia | 1 |
| L% | 1 |
| Hb | 1 |
| Bacterial Co-infection | 1 |
| N% | 1 |
| PLT | 1 |
| Retractions | 1 |
| Autumn Onset | 1 |
| Winter Onset | 1 |
| Mixed Feeding | 1 |
| La | 1 |
| Preterm | 1 |
| K | 1 |
| Cr | 1 |
| IgM | 1 |
| IgG | 1 |
| IgE | 1 |
| IgA | 1 |
| Ibil | 1 |
| IL-6 | 1 |
| GLU | 1 |
| CK | 1 |
| FER | 1 |
| CRP | 1 |
| Cl | 1 |
| ALT | 0.8 |
| Gender | 0.6 |
| ESR | 0.6 |
| γ-GT | 0.4 |
| DBil | 0.2 |
| AST | 0.2 |
| Formula-Feeding | 0.2 |
| LDH | 0 |
| Cyanosis | 0 |
| Cough | 0 |
| CK-MB | 0 |
| GLO | 0 |
| Summer Onset | 0 |
| BUN | 0 |
| WBC | 0 |
| Birth Weight | 0 |
| TP | 0 |
| Na | 0 |
